# Supplementary material
Source: PubMed Central journal article supplement (PMC5728318)
Supplement: ba005629-suppl1.pdf [file ba005629-suppl1.pdf]

**Table S1: Heritability estimates of ADAMTS13 levels using inferred genetic relatedness based on genotype data for all individuals (Left) and using known familial relationships for only the sibs (Right)**

| Cohorts                  | $h^2$ (GCTA)* | $h^2$ (MERLIN)† | $h^2$ (2xICC)‡ |
|--------------------------|---------------|-----------------|----------------|
| GABC (1,152, 1,139 sibs) | 82.1%±6.0%    | 82.10%          | 84.30%         |
| TSS (2,304, 138 sibs)    | 56.7%±12.9%   | 70.30%          | 71.00%         |
| GABC + TSS               | 59.1%±5.3%    | 79.50%          | 83.50%         |

\* GCTA estimates phenotypic variance explained by SNPs for all individuals.

† MERLIN-REGRESS estimates heritability for only the sibs.

‡ 2 times ICC estimates the upper limit of narrow-sense heritability for only sibpairs.

**Table S2: Genome-wide significant SNPs in GABC cohort**

| SNP         | Position* | Gene     | A1 | A2 | MAF  | $\beta$ (SE) % | P       |
|-------------|-----------|----------|----|----|------|----------------|---------|
| rs28673647  | 136312456 | ADAMTS13 | G  | A  | 0.36 | 6.93 (0.99)    | 8.1E-13 |
| rs28663225  | 136296231 | ADAMTS13 | T  | C  | 0.31 | 6.89 (1.02)    | 4.0E-12 |
| rs28793911  | 136299937 | ADAMTS13 | C  | T  | 0.31 | 6.81 (1.02)    | 7.2E-12 |
| rs28868680  | 136300122 | ADAMTS13 | C  | T  | 0.31 | 6.81 (1.02)    | 7.2E-12 |
| rs28880037  | 136300524 | ADAMTS13 | T  | G  | 0.31 | 6.81 (1.02)    | 7.2E-12 |
| rs4327922   | 136300712 | ADAMTS13 | T  | C  | 0.31 | 6.81 (1.02)    | 7.2E-12 |
| rs28393999  | 136303888 | ADAMTS13 | C  | G  | 0.31 | 6.81 (1.02)    | 7.2E-12 |
| rs2073934   | 136304728 | ADAMTS13 | C  | G  | 0.31 | 6.81 (1.02)    | 7.2E-12 |
| rs2073933   | 136305275 | ADAMTS13 | G  | A  | 0.31 | 6.81 (1.02)    | 7.2E-12 |
| rs2301613   | 136314677 | ADAMTS13 | G  | C  | 0.37 | 6.61 (0.99)    | 7.4E-12 |
| rs28757785  | 136291621 | ADAMTS13 | T  | A  | 0.31 | 6.75 (1.02)    | 1.1E-11 |
| rs117300748 | 136294240 | ADAMTS13 | C  | T  | 0.31 | 6.75 (1.02)    | 1.1E-11 |
| rs28436085  | 136331819 | CACFD1   | A  | G  | 0.33 | 6.15 (1.01)    | 4.3E-10 |
| rs28552957  | 136332675 | CACFD1   | A  | G  | 0.33 | 6.15 (1.01)    | 4.3E-10 |
| rs4962154   | 136332437 | CACFD1   | C  | G  | 0.33 | 6.15 (1.01)    | 4.3E-10 |
| rs68011680  | 136331281 | CACFD1   | A  | T  | 0.33 | 6.15 (1.01)    | 4.3E-10 |
| rs75340988  | 136331183 | CACFD1   | C  | T  | 0.33 | 6.15 (1.01)    | 4.3E-10 |
| rs2285489   | 136289374 | ADAMTS13 | T  | C  | 0.34 | 6.09 (1.00)    | 4.9E-10 |
| rs1055432   | 136324239 | ADAMTS13 | A  | C  | 0.34 | 6.10 (1.01)    | 5.0E-10 |
| rs28680325  | 136316367 | ADAMTS13 | A  | C  | 0.34 | 6.07 (1.01)    | 6.5E-10 |
| rs36222576  | 136319288 | ADAMTS13 | C  | G  | 0.34 | 6.07 (1.01)    | 6.5E-10 |
| rs28742053  | 136288929 | ADAMTS13 | T  | C  | 0.34 | 6.04 (1.01)    | 7.2E-10 |
| rs41297217  | 136338580 | SLC2A6   | A  | G  | 0.09 | 9.47 (1.64)    | 1.5E-09 |
| rs4962150   | 136311391 | ADAMTS13 | G  | A  | 0.39 | 5.72 (0.98)    | 1.9E-09 |
| rs2301614   | 136325160 | CACFD1   | A  | G  | 0.33 | 5.87 (1.01)    | 2.8E-09 |
| rs3118666   | 136286130 | ADAMTS13 | G  | A  | 0.36 | 5.64 (1.00)    | 6.3E-09 |
| rs3124780   | 136281925 | REXO4    | A  | G  | 0.37 | 5.50 (0.99)    | 1.3E-08 |
| rs2285486   | 136277480 | REXO4    | A  | G  | 0.37 | 5.51 (0.99)    | 1.3E-08 |
| rs9411402   | 136276892 | REXO4    | A  | C  | 0.37 | 5.51 (0.99)    | 1.3E-08 |
| rs41306714  | 136260696 | C9orf96  | C  | G  | 0.36 | 5.47 (1.00)    | 1.9E-08 |
| rs3124749   | 136267811 | C9orf96  | T  | C  | 0.36 | 5.44 (0.99)    | 2.0E-08 |
| rs3124750   | 136266086 | C9orf96  | C  | G  | 0.36 | 5.44 (0.99)    | 2.0E-08 |
| rs3124751   | 136265906 | C9orf96  | T  | C  | 0.36 | 5.44 (0.99)    | 2.0E-08 |
| rs28517680  | 136299076 | ADAMTS13 | T  | C  | 0.41 | 5.30 (0.97)    | 2.1E-08 |
| rs11516155  | 136299615 | ADAMTS13 | C  | A  | 0.41 | 5.30 (0.97)    | 2.1E-08 |
| rs3780808   | 136302434 | ADAMTS13 | T  | G  | 0.41 | 5.30 (0.97)    | 2.1E-08 |
| rs3780809   | 136302683 | ADAMTS13 | C  | T  | 0.41 | 5.30 (0.97)    | 2.1E-08 |
| rs2028003   | 136303123 | ADAMTS13 | G  | C  | 0.41 | 5.30 (0.97)    | 2.1E-08 |
| rs2028002   | 136303253 | ADAMTS13 | C  | T  | 0.41 | 5.30 (0.97)    | 2.1E-08 |
| rs2301612   | 136301982 | ADAMTS13 | G  | C  | 0.41 | 5.30 (0.97)    | 2.1E-08 |
| rs3118662   | 136278870 | REXO4    | A  | G  | 0.37 | 5.43 (0.99)    | 2.1E-08 |
| rs3124781   | 136275313 | REXO4    | T  | C  | 0.37 | 5.43 (0.99)    | 2.1E-08 |
| rs28515121  | 136291594 | ADAMTS13 | A  | G  | 0.41 | 5.24 (0.97)    | 2.9E-08 |
| rs35314130  | 136292021 | ADAMTS13 | T  | G  | 0.41 | 5.24 (0.97)    | 2.9E-08 |
| rs3094375   | 136319068 | ADAMTS13 | C  | T  | 0.45 | 5.34 (0.99)    | 3.2E-08 |
| rs3758349   | 136293066 | ADAMTS13 | C  | T  | 0.41 | 5.23 (0.97)    | 3.2E-08 |

A1, allele 1, is minor allele in GABC dataset and tested allele; A2, allele 2, is major allele;

MAF: minor allele frequency;  $\beta$ : percentage change per allele.;

\* Position uses NCBI Build 37 coordinates (UCSC hg19), which is used throughout the study.

Table S3: Genome-wide significant SNPs in TSS cohort

| SNP                      | Position* | Region | Gene     | A1  | A2         | MAF     | $\beta$ (SE) % | P       | Annotation       |
|--------------------------|-----------|--------|----------|-----|------------|---------|----------------|---------|------------------|
| rs28680325               | 136316367 | 9q34.2 | ADAMTS13 | A   | C          | 0.38    | 6.70 (0.50)    | 1.3E-42 | intronic         |
| rs28757785               | 136291621 | 9q34.2 | ADAMTS13 | T   | A          | 0.36    | 6.70 (0.50)    | 2.4E-42 | intronic         |
| 9:136294729:C:CT         | 136294729 | 9q34.2 | ADAMTS13 | CT  | C          | 0.36    | 6.70 (0.50)    | 2.4E-42 | intronic         |
| rs28663225               | 136296231 | 9q34.2 | ADAMTS13 | T   | C          | 0.36    | 6.70 (0.50)    | 2.4E-42 | intronic         |
| rs28793911               | 136299937 | 9q34.2 | ADAMTS13 | C   | T          | 0.36    | 6.68 (0.50)    | 2.8E-42 | intronic         |
| rs28868680               | 136300122 | 9q34.2 | ADAMTS13 | C   | T          | 0.36    | 6.68 (0.50)    | 2.8E-42 | intronic         |
| rs28880037               | 136300524 | 9q34.2 | ADAMTS13 | T   | G          | 0.36    | 6.68 (0.50)    | 2.8E-42 | intronic         |
| rs4327922                | 136300712 | 9q34.2 | ADAMTS13 | T   | C          | 0.36    | 6.68 (0.50)    | 2.8E-42 | intronic         |
| 9:136301483:G:GCAGTGTGGT | 136301483 | 9q34.2 | ADAMTS13 | G   | GCAGTGTGGT | 0.36    | 6.68 (0.50)    | 2.8E-42 | intronic         |
| rs28393999               | 136303888 | 9q34.2 | ADAMTS13 | C   | G          | 0.36    | 6.68 (0.50)    | 2.8E-42 | intronic         |
| rs2073934                | 136304728 | 9q34.2 | ADAMTS13 | C   | G          | 0.36    | 6.68 (0.50)    | 2.8E-42 | intronic         |
| rs2073933                | 136305275 | 9q34.2 | ADAMTS13 | G   | A          | 0.36    | 6.68 (0.50)    | 2.8E-42 | intronic         |
| rs36222576               | 136319288 | 9q34.2 | ADAMTS13 | C   | G          | 0.38    | 6.67 (0.50)    | 3.5E-42 | intronic         |
| rs2301614                | 136325160 | 9q34.2 | CACFD1   | A   | G          | 0.37    | 6.68 (0.50)    | 3.5E-42 | 5'-utr           |
| rs2301613                | 136314677 | 9q34.2 | ADAMTS13 | G   | C          | 0.39    | 6.62 (0.49)    | 4.1E-42 | intronic         |
| 9:136296084:C:CT         | 136296084 | 9q34.2 | ADAMTS13 | CT  | C          | 0.37    | 6.67 (0.50)    | 5.7E-42 | intronic         |
| rs117300748              | 136294240 | 9q34.2 | ADAMTS13 | C   | T          | 0.36    | 6.67 (0.50)    | 6.3E-42 | intronic         |
| rs1055432                | 136324239 | 9q34.2 | ADAMTS13 | A   | C          | 0.38    | 6.64 (0.50)    | 8.1E-42 | synonymous (T>T) |
| rs28673647               | 136312456 | 9q34.2 | ADAMTS13 | G   | A          | 0.39    | 6.59 (0.49)    | 9.3E-42 | intronic         |
| rs28436085               | 136331819 | 9q34.2 | CACFD1   | A   | G          | 0.38    | 6.63 (0.50)    | 1.3E-41 | intronic         |
| rs75340988               | 136331183 | 9q34.2 | CACFD1   | C   | T          | 0.38    | 6.63 (0.50)    | 1.3E-41 | intronic         |
| rs28552957               | 136332675 | 9q34.2 | CACFD1   | A   | G          | 0.38    | 6.62 (0.50)    | 1.5E-41 | intronic         |
| rs3837294                | 136331700 | 9q34.2 | CACFD1   | C   | CAT        | 0.38    | 6.61 (0.50)    | 2.3E-41 | intronic         |
| rs68011680               | 136331281 | 9q34.2 | CACFD1   | A   | T          | 0.38    | 6.61 (0.50)    | 2.3E-41 | intronic         |
| rs4962150                | 136311391 | 9q34.2 | ADAMTS13 | G   | A          | 0.44    | 6.42 (0.49)    | 6.4E-41 | intronic         |
| rs3094375                | 136319068 | 9q34.2 | ADAMTS13 | C   | T          | 0.48    | 6.19 (0.48)    | 6.0E-39 | intronic         |
| rs4962154                | 136332437 | 9q34.2 | CACFD1   | C   | G          | 0.38    | 6.10 (0.50)    | 1.8E-35 | intronic         |
| rs144473590              | 136298286 | 9q34.2 | ADAMTS13 | C   | G          | 0.02    | -26.46 (1.91)  | 2.3E-34 | intronic         |
| rs74715985               | 136304114 | 9q34.2 | ADAMTS13 | G   | A          | 0.02    | -26.46 (1.91)  | 2.3E-34 | intronic         |
| rs41314453               | 136307825 | 9q34.2 | ADAMTS13 | T   | C          | 0.02    | -26.46 (1.91)  | 2.3E-34 | missense (A>V)   |
| rs2285489                | 136289374 | 9q34.2 | ADAMTS13 | T   | C          | 0.40    | 5.94 (0.50)    | 6.8E-34 | intronic         |
| rs3118667                | 136291063 | 9q34.2 | ADAMTS13 | C   | T          | 0.50    | 5.69 (0.48)    | 2.4E-33 | synonymous (A>A) |
| rs28742053               | 136288929 | 9q34.2 | ADAMTS13 | T   | C          | 0.4045  | 5.80 (0.50)    | 1.8E-32 | intronic         |
| rs28515121               | 136291594 | 9q34.2 | ADAMTS13 | A   | G          | 0.4427  | 5.45 (0.49)    | 1.4E-29 | intronic         |
| rs35314130               | 136292021 | 9q34.2 | ADAMTS13 | T   | G          | 0.4427  | 5.45 (0.49)    | 1.4E-29 | intronic         |
| rs3758349                | 136293066 | 9q34.2 | ADAMTS13 | C   | T          | 0.4427  | 5.45 (0.49)    | 1.4E-29 | intronic         |
| rs28517680               | 136299076 | 9q34.2 | ADAMTS13 | T   | C          | 0.4431  | 5.45 (0.49)    | 1.5E-29 | intronic         |
| rs11516155               | 136299615 | 9q34.2 | ADAMTS13 | C   | A          | 0.4431  | 5.45 (0.49)    | 1.5E-29 | intronic         |
| rs3780808                | 136302434 | 9q34.2 | ADAMTS13 | T   | G          | 0.4431  | 5.45 (0.49)    | 1.5E-29 | intronic         |
| rs3780809                | 136302683 | 9q34.2 | ADAMTS13 | C   | T          | 0.4431  | 5.45 (0.49)    | 1.5E-29 | intronic         |
| rs2028003                | 136303123 | 9q34.2 | ADAMTS13 | G   | C          | 0.4431  | 5.45 (0.49)    | 1.5E-29 | intronic         |
| rs2028002                | 136303253 | 9q34.2 | ADAMTS13 | C   | T          | 0.4431  | 5.45 (0.49)    | 1.5E-29 | intronic         |
| rs2301612                | 136301982 | 9q34.2 | ADAMTS13 | G   | C          | 0.4431  | 5.45 (0.49)    | 1.5E-29 | missense (Q>E)   |
| 9:136297157:G:GGC        | 136297157 | 9q34.2 | ADAMTS13 | GGC | G          | 0.4427  | 5.45 (0.49)    | 1.7E-29 | intronic         |
| rs77533110               | 136286789 | 9q34.2 | ADAMTS13 | A   | G          | 0.0178  | -23.74 (1.90)  | 5.8E-29 | intronic         |
| rs671410                 | 136311679 | 9q34.2 | ADAMTS13 | G   | T          | 0.4536  | -5.66 (0.49)   | 7.7E-29 | intronic         |
| rs74538790               | 136215511 | 9q34.2 | RPL7A    | C   | T          | 0.01823 | -23.30 (1.88)  | 1.0E-28 | intronic         |
| rs3118666                | 136286130 | 9q34.2 | ADAMTS13 | G   | A          | 0.4178  | 5.44 (0.50)    | 1.3E-28 | intronic         |
| rs139428144              | 136223537 | 9q34.2 | SURF2    | T   | C          | 0.01801 | -23.33 (1.89)  | 2.0E-28 | synonymous (D>D) |
| rs77812622               | 136224174 | 9q34.2 | SURF2    | A   | G          | 0.01801 | -23.33 (1.89)  | 2.0E-28 | intronic         |
| rs28400378               | 136242607 | 9q34.2 | SURF4    | A   | G          | 0.01801 | -23.33 (1.89)  | 2.0E-28 | intronic         |
| rs28407036               | 136252654 | 9q34.2 | C9orf96  | T   | C          | 0.01801 | -23.33 (1.89)  | 2.0E-28 | intronic         |
| rs3739893                | 136243324 | 9q34.2 | C9orf96  | T   | C          | 0.01801 | -23.33 (1.89)  | 2.0E-28 | 5'-utr           |
| rs78883179               | 136241818 | 9q34.2 | SURF4    | C   | G          | 0.01801 | -23.33 (1.89)  | 2.0E-28 | intronic         |
| rs8181039                | 136253927 | 9q34.2 | C9orf96  | A   | G          | 0.01801 | -23.33 (1.89)  | 2.0E-28 | intronic         |
| rs28519070               | 136204198 | 9q34.2 | MED22    | T   | A          | 0.3832  | 5.42 (0.50)    | 7.1E-28 | 3'-downstream    |
| rs2285486                | 136277480 | 9q34.2 | REXO4    | A   | G          | 0.4151  | 5.30 (0.50)    | 3.2E-27 | synonymous (T>T) |
| rs3118662                | 136278870 | 9q34.2 | REXO4    | A   | G          | 0.4151  | 5.30 (0.50)    | 3.2E-27 | intronic         |
| rs3124781                | 136275313 | 9q34.2 | REXO4    | T   | C          | 0.4151  | 5.30 (0.50)    | 3.2E-27 | intronic         |
| rs9411402                | 136276892 | 9q34.2 | REXO4    | A   | C          | 0.4151  | 5.30 (0.50)    | 3.2E-27 | intronic         |
| rs3124780                | 136281925 | 9q34.2 | REXO4    | A   | G          | 0.4164  | 5.28 (0.50)    | 4.2E-27 | intronic         |
| rs3124749                | 136267811 | 9q34.2 | C9orf96  | T   | C          | 0.4214  | 5.25 (0.50)    | 6.1E-27 | intronic         |
| rs3124750                | 136266086 | 9q34.2 | C9orf96  | C   | G          | 0.4214  | 5.25 (0.50)    | 6.1E-27 | intronic         |
| rs41306714               | 136260696 | 9q34.2 | C9orf96  | C   | G          | 0.4214  | 5.25 (0.50)    | 6.1E-27 | intronic         |
| rs79030145               | 136341776 | 9q34.2 | SLC2A6   | G   | C          | 0.02062 | -20.79 (1.76)  | 9.5E-27 | intronic         |
| rs3124751                | 136265906 | 9q34.2 | C9orf96  | T   | C          | 0.423   | 5.21 (0.50)    | 1.3E-26 | intronic         |
| rs1141748                | 136195840 | 9q34.2 | SURF6    | C   | T          | 0.3783  | 5.32 (0.51)    | 1.4E-26 | 3'-downstream    |
| rs886089                 | 136199466 | 9q34.2 | SURF6    | A   | G          | 0.3776  | 5.31 (0.51)    | 1.8E-26 | missense (T>M)   |
| rs886090                 | 136199503 | 9q34.2 | SURF6    | A   | G          | 0.3776  | 5.31 (0.51)    | 1.8E-26 | missense (R>W)   |
| rs2353633                | 136197135 | 9q34.2 | SURF6    | T   | C          | 0.378   | 5.31 (0.51)    | 1.9E-26 | 3'-downstream    |
| rs877560                 | 136197131 | 9q34.2 | SURF6    | A   | G          | 0.378   | 5.31 (0.51)    | 1.9E-26 | 3'-downstream    |
| rs10751505               | 136195374 | 9q34.2 | SURF6    | G   | A          | 0.3798  | 5.26 (0.51)    | 3.6E-26 | 3'-downstream    |
| rs76896860               | 136196174 | 9q34.2 | SURF6    | A   | G          | 0.3798  | 5.26 (0.51)    | 3.6E-26 | 3'-downstream    |
| rs3124767                | 136308542 | 9q34.2 | ADAMTS13 | T   | C          | 0.4058  | -5.32 (0.49)   | 2.7E-25 | synonymous (G>G) |
| rs3118664                | 136281917 | 9q34.2 | ADAMTS13 | A   | C          | 0.4455  | 5.00 (0.49)    | 4.1E-25 | intronic         |
| rs3124779                | 136281966 | 9q34.2 | ADAMTS13 | A   | G          | 0.4455  | 5.00 (0.49)    | 4.1E-25 | intronic         |
| rs62575995               | 136268311 | 9q34.2 | C9orf96  | A   | G          | 0.4818  | -5.22 (0.49)   | 5.4E-25 | intronic         |
| 9:136292927:T:TA         | 136292927 | 9q34.2 | ADAMTS13 | TA  | T          | 0.4227  | -5.21 (0.49)   | 1.1E-24 | intronic         |
| rs3118669                | 136295815 | 9q34.2 | ADAMTS13 | A   | T          | 0.4132  | -5.23 (0.49)   | 1.6E-24 | intronic         |
| rs739469                 | 136298729 | 9q34.2 | ADAMTS13 | C   | G          | 0.4219  | -5.19 (0.49)   | 2.3E-24 | intronic         |
| rs3124768                | 136304497 | 9q34.2 | ADAMTS13 | G   | A          | 0.4221  | -5.18 (0.49)   | 2.8E-24 | synonymous (T>T) |
| rs2073932                | 136305439 | 9q34.2 | ADAMTS13 | A   | G          | 0.4221  | -5.18 (0.49)   | 2.8E-24 | intronic         |

|                     |           |        |          |    |       |         |               |         |                  |
|---------------------|-----------|--------|----------|----|-------|---------|---------------|---------|------------------|
| rs3124769           | 136304137 | 9q34.2 | ADAMTS13 | T  | A     | 0.4234  | -5.17 (0.49)  | 3.0E-24 | intronic         |
| rs4962130           | 136195607 | 9q34.2 | SURF6    | C  | T     | 0.0191  | -19.85 (1.80) | 1.4E-23 | 3'-downstream    |
| rs11244090          | 136201191 | 9q34.2 | SURF6    | A  | G     | 0.01866 | -20.09 (1.83) | 1.5E-23 | intronic         |
| rs604402            | 136213056 | 9q34.2 | MED22    | A  | C     | 0.4158  | 4.88 (0.50)   | 5.5E-23 | intronic         |
| rs616836            | 136213521 | 9q34.2 | MED22    | T  | C     | 0.4158  | 4.88 (0.50)   | 5.5E-23 | 5'-utr           |
| rs553877            | 136214955 | 9q34.2 | MED22    | A  | G     | 0.4147  | 4.88 (0.50)   | 5.7E-23 | 5'-utr           |
| rs59358281          | 136223043 | 9q34.2 | SURF1    | G  | C     | 0.4156  | 4.87 (0.50)   | 6.1E-23 | intronic         |
| rs12763             | 136227260 | 9q34.2 | SURF2    | A  | G     | 0.416   | 4.86 (0.50)   | 7.0E-23 | missense (S>G)   |
| rs2296810           | 136227694 | 9q34.2 | SURF2    | G  | C     | 0.416   | 4.86 (0.50)   | 7.0E-23 | intronic         |
| rs1059773           | 136228865 | 9q34.2 | SURF4    | A  | C     | 0.416   | 4.86 (0.50)   | 7.0E-23 | 3'-utr           |
| rs2269894           | 136232758 | 9q34.2 | SURF4    | C  | T     | 0.416   | 4.86 (0.50)   | 7.0E-23 | intronic         |
| rs2494              | 136229833 | 9q34.2 | SURF4    | G  | C     | 0.416   | 4.86 (0.50)   | 7.0E-23 | 3'-utr           |
| rs28374096          | 136235100 | 9q34.2 | SURF4    | C  | G     | 0.416   | 4.86 (0.50)   | 7.0E-23 | intronic         |
| rs7030175           | 136274058 | 9q34.2 | REXO4    | G  | T     | 0.4818  | 4.67 (0.49)   | 4.5E-22 | intronic         |
| rs187680653         | 136322351 | 9q34.2 | ADAMTS13 | T  | C     | 0.01063 | -25.99 (2.44) | 2.1E-21 | intronic         |
| rs28479961          | 136312074 | 9q34.2 | ADAMTS13 | T  | G     | 0.1953  | 5.47 (0.62)   | 1.0E-19 | intronic         |
| rs3124776           | 136284450 | 9q34.2 | ADAMTS13 | C  | T     | 0.4742  | -4.58 (0.49)  | 1.8E-19 | intronic         |
| rs3124747           | 136268084 | 9q34.2 | C9orf96  | A  | G     | 0.3247  | -4.82 (0.52)  | 3.7E-19 | missense (K>E)   |
| rs3118663           | 136281753 | 9q34.2 | REXO4    | A  | G     | 0.4766  | -4.44 (0.49)  | 2.1E-18 | intronic         |
| rs2182812           | 136272618 | 9q34.2 | REXO4    | A  | G     | 0.4761  | -4.42 (0.49)  | 2.9E-18 | intronic         |
| rs3124782           | 136270996 | 9q34.2 | C9orf96  | T  | C     | 0.4761  | -4.42 (0.49)  | 2.9E-18 | 3'-utr           |
| rs3124753           | 136249929 | 9q34.2 | C9orf96  | A  | G     | 0.4698  | -4.40 (0.49)  | 3.8E-18 | intronic         |
| rs943623            | 136267371 | 9q34.2 | C9orf96  | T  | G     | 0.4685  | -4.40 (0.49)  | 4.1E-18 | intronic         |
| rs3124752           | 136264493 | 9q34.2 | C9orf96  | T  | C     | 0.4657  | -4.32 (0.49)  | 1.6E-17 | intronic         |
| rs10793964          | 136198589 | 9q34.2 | SURF6    | G  | C     | 0.4486  | 4.13 (0.50)   | 2.3E-17 | 3'-utr           |
| rs183622578         | 136342830 | 9q34.2 | SLC2A6   | A  | G     | 0.01541 | -18.37 (2.05) | 1.6E-16 | intronic         |
| rs10901263          | 136192872 | 9q34.2 | SURF6    | A  | G     | 0.2648  | 4.50 (0.57)   | 7.0E-16 | 3'-downstream    |
| rs11244083          | 136190948 | 9q34.2 | SURF6    | A  | G     | 0.2652  | 4.49 (0.57)   | 7.3E-16 | 3'-downstream    |
| rs10901262          | 136192116 | 9q34.2 | SURF6    | A  | G     | 0.2652  | 4.49 (0.57)   | 7.3E-16 | 3'-downstream    |
| rs17150482          | 136194595 | 9q34.2 | SURF6    | C  | T     | 0.3125  | 4.23 (0.54)   | 1.2E-15 | 3'-downstream    |
| rs558599            | 136192551 | 9q34.2 | SURF6    | A  | C     | 0.3138  | 4.20 (0.54)   | 3.2E-15 | 3'-downstream    |
| rs571549            | 136221213 | 9q34.2 | SURF1    | T  | C     | 0.4755  | -3.99 (0.50)  | 3.7E-15 | intronic         |
| rs658517            | 136222490 | 9q34.2 | SURF1    | G  | A     | 0.4755  | -3.99 (0.50)  | 3.7E-15 | intronic         |
| rs484248            | 136218590 | 9q34.2 | SURF1    | A  | C     | 0.4753  | -3.99 (0.50)  | 4.0E-15 | 3'-downstream    |
| rs599924            | 136218591 | 9q34.2 | SURF1    | G  | A     | 0.4753  | -3.99 (0.50)  | 4.0E-15 | 3'-downstream    |
| rs1179037           | 136238509 | 9q34.2 | SURF4    | A  | G     | 0.4753  | -3.97 (0.50)  | 4.9E-15 | intronic         |
| rs1179038           | 136241189 | 9q34.2 | SURF4    | T  | C     | 0.475   | -3.97 (0.50)  | 4.9E-15 | intronic         |
| rs1179040           | 136241639 | 9q34.2 | SURF4    | T  | C     | 0.475   | -3.97 (0.50)  | 4.9E-15 | intronic         |
| 9:136192551:A:AC    | 136192551 | 9q34.2 | SURF6    | A  | AC    | 0.26    | 4.38 (0.57)   | 5.0E-15 | 3'-downstream    |
| rs523304            | 136223366 | 9q34.2 | SURF1    | A  | G     | 0.475   | -3.95 (0.50)  | 7.3E-15 | 5'-upstream      |
| rs28660186          | 136331879 | 9q34.2 | CACFD1   | C  | A     | 0.3292  | -4.14 (0.52)  | 1.4E-14 | intronic         |
| rs9645009           | 136211248 | 9q34.2 | MED22    | A  | G     | 0.4972  | -3.90 (0.50)  | 1.6E-14 | intronic         |
| rs4962155           | 136339797 | 9q34.2 | SLC2A6   | A  | G     | 0.3257  | -4.12 (0.53)  | 2.0E-14 | intronic         |
| rs2301615           | 136325462 | 9q34.2 | CACFD1   | T  | C     | 0.3296  | -4.11 (0.52)  | 2.1E-14 | intronic         |
| rs1858879           | 136325907 | 9q34.2 | CACFD1   | C  | G     | 0.3296  | -4.11 (0.52)  | 2.1E-14 | intronic         |
| 9:136326145:A:AGTCT | 136326145 | 9q34.2 | CACFD1   | A  | AGTCT | 0.3296  | -4.11 (0.52)  | 2.1E-14 | intronic         |
| rs655911            | 136312897 | 9q34.2 | ADAMTS13 | C  | T     | 0.3058  | -4.18 (0.53)  | 2.2E-14 | intronic         |
| rs1179041           | 136242669 | 9q34.2 | SURF4    | C  | T     | 0.4709  | -3.85 (0.49)  | 3.0E-14 | intronic         |
| rs4962050           | 136323845 | 9q34.2 | ADAMTS13 | C  | G     | 0.3303  | -4.06 (0.52)  | 4.1E-14 | intronic         |
| rs487820            | 136212369 | 9q34.2 | MED22    | A  | G     | 0.4705  | -3.80 (0.49)  | 5.6E-14 | intronic         |
| rs652600            | 136311017 | 9q34.2 | ADAMTS13 | G  | A     | 0.3177  | -3.99 (0.53)  | 1.7E-13 | intronic         |
| 9:136326150:G:GT    | 136326150 | 9q34.2 | CACFD1   | G  | GT    | 0.2289  | -4.35 (0.58)  | 2.2E-13 | intronic         |
| rs590858            | 136205775 | 9q34.2 | MED22    | C  | T     | 0.4696  | -3.67 (0.49)  | 3.1E-13 | 3'-downstream    |
| rs3124748           | 136268038 | 9q34.2 | C9orf96  | T  | C     | 0.4444  | -3.64 (0.50)  | 6.0E-13 | synonymous (N>N) |
| rs120858            | 136200810 | 9q34.2 | SURF6    | A  | G     | 0.4557  | -3.47 (0.49)  | 3.9E-12 | intronic         |
| rs3739890           | 136194812 | 9q34.2 | SURF6    | A  | G     | 0.4564  | -3.45 (0.49)  | 5.0E-12 | 3'-downstream    |
| rs642059            | 136195734 | 9q34.2 | SURF6    | C  | A     | 0.4557  | -3.45 (0.49)  | 5.5E-12 | 3'-downstream    |
| rs642060            | 136195736 | 9q34.2 | SURF6    | C  | G     | 0.4557  | -3.45 (0.49)  | 5.5E-12 | 3'-downstream    |
| rs12335             | 136197834 | 9q34.2 | SURF6    | A  | G     | 0.4557  | -3.45 (0.49)  | 5.5E-12 | 3'-utr           |
| rs551154            | 136197278 | 9q34.2 | SURF6    | T  | G     | 0.4557  | -3.45 (0.49)  | 5.5E-12 | 3'-downstream    |
| rs551169            | 136197286 | 9q34.2 | SURF6    | A  | G     | 0.4557  | -3.45 (0.49)  | 5.5E-12 | 3'-downstream    |
| 9:136160859:C:CA    | 136160859 | 9q34.2 | ABO      | CA | C     | 0.3613  | 3.45 (0.51)   | 7.3E-12 | 5'-upstream      |
| rs75499965          | 136361582 | 9q34.2 | SLC2A6   | A  | C     | 0.02756 | -10.58 (1.52) | 2.8E-11 | 5'-upstream      |
| rs176691            | 136163306 | 9q34.2 | ABO      | A  | G     | 0.3557  | -3.36 (0.52)  | 1.6E-10 | 5'-upstream      |
| rs176692            | 136163329 | 9q34.2 | ABO      | G  | A     | 0.3557  | -3.36 (0.52)  | 1.6E-10 | 5'-upstream      |
| rs11244064          | 136161837 | 9q34.2 | ABO      | A  | G     | 0.3077  | -3.39 (0.53)  | 2.8E-10 | 5'-upstream      |
| rs3118671           | 136297407 | 9q34.2 | ADAMTS13 | T  | G     | 0.2014  | -3.93 (0.61)  | 3.0E-10 | intronic         |
| rs11244061          | 136153981 | 9q34.2 | ABO      | T  | C     | 0.0816  | -5.69 (0.89)  | 4.6E-10 | 5'-upstream      |
| rs176699            | 136168086 | 9q34.2 | ABO      | A  | C     | 0.3557  | -3.25 (0.52)  | 5.8E-10 | 5'-upstream      |
| rs7869258           | 136170732 | 9q34.2 | ABO      | A  | G     | 0.3557  | -3.25 (0.52)  | 5.8E-10 | 5'-upstream      |
| rs532861            | 136171344 | 9q34.2 | ABO      | T  | C     | 0.3529  | -3.15 (0.51)  | 1.7E-09 | 5'-upstream      |
| rs4962126           | 136176998 | 9q34.2 | ABO      | T  | C     | 0.3657  | -3.16 (0.52)  | 1.8E-09 | 5'-upstream      |
| rs623179            | 136174678 | 9q34.2 | ABO      | T  | C     | 0.3155  | -3.14 (0.53)  | 4.2E-09 | 5'-upstream      |
| rs509001            | 136176269 | 9q34.2 | ABO      | A  | T     | 0.4681  | -2.87 (0.50)  | 1.6E-08 | 5'-upstream      |
| rs9411492           | 136160617 | 9q34.2 | ABO      | C  | T     | 0.2878  | 3.02 (0.55)   | 1.8E-08 | 5'-upstream      |
| rs10901257          | 136163570 | 9q34.2 | ABO      | A  | G     | 0.2869  | 3.02 (0.54)   | 1.8E-08 | 5'-upstream      |
| rs3118665           | 136283389 | 9q34.2 | ADAMTS13 | T  | C     | 0.1519  | -3.92 (0.68)  | 1.9E-08 | intronic         |
| rs609202            | 136173855 | 9q34.2 | ABO      | T  | A     | 0.4674  | -2.84 (0.50)  | 2.0E-08 | 5'-upstream      |
| rs10901256          | 136163447 | 9q34.2 | ABO      | C  | T     | 0.286   | 3.01 (0.55)   | 2.4E-08 | 5'-upstream      |
| rs12683804          | 136186586 | 9q34.2 | SURF6    | T  | C     | 0.2272  | -3.27 (0.59)  | 5.0E-08 | 3'-downstream    |

A1, allele 1, is minor allele in TSS dataset and tested allele; A2, allele 2, is major allele; MAF: minor allele frequency;  $\beta$ : percentage change per allele.

\* Position uses NCBI Build 37 coordinates (UCSC hg19), which is used throughout the study.

Table S4. Significant SNPs in meta-analysis and their statistics in individual cohorts  
 Meta-analysis of GABC + TSS (5,821,939 SNPs)

| CHR | SNP         | Position* | A1 | A2 | Gene         | Function        | P       | Dir | FREQ | GABC (N=934)   |         | TSS (N=2,304) |                 |         |
|-----|-------------|-----------|----|----|--------------|-----------------|---------|-----|------|----------------|---------|---------------|-----------------|---------|
|     |             |           |    |    |              |                 |         |     |      | $\beta$ (SE) % | P2      | FREQ          | $\beta$ (SE) %4 | P3      |
| 9   | rs28673647  | 136312456 | G  | A  | ADAMTS13     | intronic        | 1.3E-52 | --  | 0.36 | 6.9 (1.0)      | 8.1E-13 | 0.39          | 6.6 (0.5)       | 9.3E-42 |
| 9   | rs28663225  | 136296231 | T  | C  | ADAMTS13     | intronic        | 2.3E-52 | --  | 0.31 | 6.9 (1.0)      | 4.0E-12 | 0.36          | 6.7 (0.5)       | 2.4E-42 |
| 9   | rs28793911  | 136299937 | C  | T  | ADAMTS13     | intronic        | 5.2E-52 | --  | 0.31 | 6.8 (1.0)      | 7.2E-12 | 0.36          | 6.7 (0.5)       | 2.8E-42 |
| 9   | rs28868680  | 136300122 | C  | T  | ADAMTS13     | intronic        | 5.2E-52 | --  | 0.31 | 6.8 (1.0)      | 7.2E-12 | 0.36          | 6.7 (0.5)       | 2.8E-42 |
| 9   | rs28890037  | 136300524 | T  | G  | ADAMTS13     | intronic        | 5.2E-52 | --  | 0.31 | 6.8 (1.0)      | 7.2E-12 | 0.36          | 6.7 (0.5)       | 2.8E-42 |
| 9   | rs4327922   | 136300712 | T  | C  | ADAMTS13     | intronic        | 5.2E-52 | --  | 0.31 | 6.8 (1.0)      | 7.2E-12 | 0.36          | 6.7 (0.5)       | 2.8E-42 |
| 9   | rs28393999  | 136303888 | C  | G  | ADAMTS13     | intronic        | 5.2E-52 | --  | 0.31 | 6.8 (1.0)      | 7.2E-12 | 0.36          | 6.7 (0.5)       | 2.8E-42 |
| 9   | rs2073934   | 136304728 | C  | G  | ADAMTS13     | intronic        | 5.2E-52 | --  | 0.31 | 6.8 (1.0)      | 7.2E-12 | 0.36          | 6.7 (0.5)       | 2.8E-42 |
| 9   | rs2073933   | 136305275 | G  | A  | ADAMTS13     | intronic        | 5.2E-52 | --  | 0.31 | 6.8 (1.0)      | 7.2E-12 | 0.36          | 6.7 (0.5)       | 2.8E-42 |
| 9   | rs28757785  | 136291621 | T  | A  | ADAMTS13     | intronic        | 7.6E-52 | --  | 0.31 | 6.8 (1.0)      | 1.1E-11 | 0.36          | 6.7 (0.5)       | 2.4E-42 |
| 9   | rs2301613   | 136314677 | G  | C  | ADAMTS13     | intronic        | 7.7E-52 | --  | 0.37 | 6.6 (1.0)      | 7.4E-12 | 0.39          | 6.6 (0.5)       | 4.1E-42 |
| 9   | rs117300748 | 136294240 | C  | T  | ADAMTS13     | intronic        | 1.9E-51 | --  | 0.31 | 6.8 (1.0)      | 1.1E-11 | 0.36          | 6.7 (0.5)       | 6.3E-42 |
| 9   | rs28680325  | 136316367 | A  | C  | ADAMTS13     | intronic        | 6.1E-50 | --  | 0.34 | 6.1 (1.0)      | 6.5E-10 | 0.38          | 6.7 (0.5)       | 1.3E-42 |
| 9   | rs36222576  | 136319288 | C  | G  | ADAMTS13     | intronic        | 1.5E-49 | --  | 0.34 | 6.1 (1.0)      | 6.5E-10 | 0.38          | 6.7 (0.5)       | 3.5E-42 |
| 9   | rs1055432   | 136324239 | A  | C  | ADAMTS13     | synonymous(T>T) | 2.3E-49 | --  | 0.34 | 6.1 (1.0)      | 5.0E-10 | 0.38          | 6.6 (0.5)       | 8.1E-42 |
| 9   | rs28436085  | 136331819 | A  | G  | CACFD1       | intronic        | 2.9E-49 | --  | 0.33 | 6.2 (1.0)      | 4.3E-10 | 0.38          | 6.6 (0.5)       | 1.3E-41 |
| 9   | rs75340988  | 136331183 | C  | T  | CACFD1       | intronic        | 2.9E-49 | --  | 0.33 | 6.2 (1.0)      | 4.3E-10 | 0.38          | 6.6 (0.5)       | 1.3E-41 |
| 9   | rs28552957  | 136332675 | A  | G  | CACFD1       | intronic        | 3.4E-49 | --  | 0.33 | 6.2 (1.0)      | 4.3E-10 | 0.38          | 6.6 (0.5)       | 1.5E-41 |
| 9   | rs68011680  | 136331281 | A  | T  | CACFD1       | intronic        | 5.0E-49 | --  | 0.33 | 6.2 (1.0)      | 4.3E-10 | 0.38          | 6.6 (0.5)       | 2.3E-41 |
| 9   | rs2301614   | 136325160 | A  | G  | CACFD1       | 5'-utr          | 9.8E-49 | --  | 0.33 | 5.9 (1.0)      | 2.8E-09 | 0.37          | 6.7 (0.5)       | 3.5E-42 |
| 9   | rs4962150   | 136311391 | G  | A  | ADAMTS13     | intronic        | 8.4E-48 | --  | 0.39 | 5.7 (1.0)      | 1.9E-09 | 0.44          | 6.4 (0.5)       | 6.4E-41 |
| 9   | rs3094375   | 136319068 | C  | T  | ADAMTS13     | intronic        | 2.0E-44 | --  | 0.45 | 5.3 (1.0)      | 3.2E-08 | 0.48          | 6.2 (0.5)       | 6.0E-39 |
| 9   | rs4962154   | 136332437 | C  | G  | CACFD1       | intronic        | 1.5E-43 | --  | 0.33 | 6.2 (1.0)      | 4.3E-10 | 0.38          | 6.1 (0.5)       | 1.8E-35 |
| 9   | rs2285489   | 136289374 | T  | C  | ADAMTS13     | intronic        | 5.4E-42 | --  | 0.34 | 6.1 (1.0)      | 4.9E-10 | 0.40          | 5.9 (0.5)       | 6.8E-34 |
| 9   | rs28742053  | 136288929 | T  | C  | ADAMTS13     | intronic        | 1.8E-40 | --  | 0.34 | 6.0 (1.0)      | 7.2E-10 | 0.40          | 5.8 (0.5)       | 1.8E-32 |
| 9   | rs3118667   | 136291063 | C  | T  | ADAMTS13     | synonymous(A>A) | 2.6E-36 | --  | 0.45 | 4.3 (1.0)      | 5.8E-06 | 0.50          | 5.7 (0.5)       | 2.4E-33 |
| 9   | rs28517680  | 136299076 | T  | C  | ADAMTS13     | intronic        | 4.9E-36 | --  | 0.41 | 5.3 (1.0)      | 2.1E-08 | 0.44          | 5.4 (0.5)       | 1.5E-29 |
| 9   | rs11516155  | 136299615 | C  | A  | ADAMTS13     | intronic        | 4.9E-36 | --  | 0.41 | 5.3 (1.0)      | 2.1E-08 | 0.44          | 5.4 (0.5)       | 1.5E-29 |
| 9   | rs3780808   | 136302434 | T  | G  | ADAMTS13     | intronic        | 4.9E-36 | --  | 0.41 | 5.3 (1.0)      | 2.1E-08 | 0.44          | 5.4 (0.5)       | 1.5E-29 |
| 9   | rs3780809   | 136302683 | C  | T  | ADAMTS13     | intronic        | 4.9E-36 | --  | 0.41 | 5.3 (1.0)      | 2.1E-08 | 0.44          | 5.4 (0.5)       | 1.5E-29 |
| 9   | rs2028003   | 136303123 | G  | C  | ADAMTS13     | intronic        | 4.9E-36 | --  | 0.41 | 5.3 (1.0)      | 2.1E-08 | 0.44          | 5.4 (0.5)       | 1.5E-29 |
| 9   | rs2028002   | 136303253 | C  | T  | ADAMTS13     | intronic        | 4.9E-36 | --  | 0.41 | 5.3 (1.0)      | 2.1E-08 | 0.44          | 5.4 (0.5)       | 1.5E-29 |
| 9   | rs2301612   | 136301982 | G  | C  | ADAMTS13     | missense(Q>E)   | 4.9E-36 | --  | 0.41 | 5.3 (1.0)      | 2.1E-08 | 0.44          | 5.4 (0.5)       | 1.5E-29 |
| 9   | rs28515121  | 136291594 | A  | G  | ADAMTS13     | intronic        | 7.0E-36 | --  | 0.41 | 5.2 (1.0)      | 2.9E-08 | 0.44          | 5.5 (0.5)       | 1.4E-29 |
| 9   | rs35314130  | 136292021 | T  | G  | ADAMTS13     | intronic        | 7.0E-36 | --  | 0.41 | 5.2 (1.0)      | 2.9E-08 | 0.44          | 5.5 (0.5)       | 1.4E-29 |
| 9   | rs3758349   | 136293066 | C  | T  | ADAMTS13     | intronic        | 7.9E-36 | --  | 0.41 | 5.2 (1.0)      | 3.2E-08 | 0.44          | 5.5 (0.5)       | 1.4E-29 |
| 9   | rs3118666   | 136286130 | G  | A  | ADAMTS13     | intronic        | 9.6E-36 | --  | 0.36 | 5.6 (1.0)      | 6.3E-09 | 0.42          | 5.4 (0.5)       | 1.3E-28 |
| 9   | rs671410    | 136311679 | G  | T  | ADAMTS13     | intronic        | 4.3E-34 | ++  | 0.47 | -5.2 (1.0)     | 2.4E-07 | 0.45          | -5.7 (0.5)      | 7.7E-29 |
| 9   | rs2285486   | 136277480 | A  | G  | REXO4        | synonymous(T>T) | 4.4E-34 | --  | 0.37 | 5.5 (1.0)      | 1.3E-08 | 0.42          | 5.3 (0.5)       | 3.2E-27 |
| 9   | rs9411402   | 136276892 | A  | C  | REXO4        | intronic        | 4.4E-34 | --  | 0.37 | 5.5 (1.0)      | 1.3E-08 | 0.42          | 5.3 (0.5)       | 3.2E-27 |
| 9   | rs3124780   | 136281925 | A  | G  | REXO4        | intronic        | 5.6E-34 | --  | 0.37 | 5.5 (1.0)      | 1.3E-08 | 0.42          | 5.3 (0.5)       | 4.2E-27 |
| 9   | rs3118662   | 136278870 | A  | G  | REXO4        | intronic        | 7.8E-34 | --  | 0.37 | 5.4 (1.0)      | 2.1E-08 | 0.42          | 5.3 (0.5)       | 3.2E-27 |
| 9   | rs3124781   | 136275313 | T  | C  | REXO4        | intronic        | 7.8E-34 | --  | 0.37 | 5.4 (1.0)      | 2.1E-08 | 0.42          | 5.3 (0.5)       | 3.2E-27 |
| 9   | rs41306714  | 136260696 | C  | G  | C9orf96      | intronic        | 1.3E-33 | --  | 0.36 | 5.5 (1.0)      | 1.9E-08 | 0.42          | 5.3 (0.5)       | 6.1E-27 |
| 9   | rs3124749   | 136267811 | T  | C  | C9orf96      | intronic        | 1.3E-33 | --  | 0.36 | 5.4 (1.0)      | 2.0E-08 | 0.42          | 5.3 (0.5)       | 6.1E-27 |
| 9   | rs3124750   | 136266086 | C  | G  | C9orf96      | intronic        | 1.3E-33 | --  | 0.36 | 5.4 (1.0)      | 2.0E-08 | 0.42          | 5.3 (0.5)       | 6.1E-27 |
| 9   | rs3124751   | 136265906 | T  | C  | C9orf96      | intronic        | 2.7E-33 | --  | 0.36 | 5.4 (1.0)      | 2.0E-08 | 0.42          | 5.2 (0.5)       | 1.3E-26 |
| 9   | rs28519070  | 136204198 | T  | A  | MED22        | 3'-downstream   | 3.2E-33 | --  | 0.34 | 5.2 (1.0)      | 2.3E-07 | 0.38          | 5.4 (0.5)       | 7.1E-28 |
| 9   | rs1141748   | 136195840 | C  | T  | SURF6        | 3'-downstream   | 8.2E-32 | --  | 0.33 | 5.1 (1.0)      | 3.4E-07 | 0.38          | 5.3 (0.5)       | 1.4E-26 |
| 9   | rs2353633   | 136197135 | T  | C  | SURF6        | 3'-downstream   | 1.1E-31 | --  | 0.33 | 5.1 (1.0)      | 3.4E-07 | 0.38          | 5.3 (0.5)       | 1.9E-26 |
| 9   | rs877560    | 136197131 | A  | G  | SURF6        | 3'-downstream   | 1.1E-31 | --  | 0.33 | 5.1 (1.0)      | 3.4E-07 | 0.38          | 5.3 (0.5)       | 1.9E-26 |
| 9   | rs10751505  | 136195374 | G  | A  | SURF6        | 3'-downstream   | 1.2E-31 | --  | 0.34 | 5.2 (1.0)      | 2.3E-07 | 0.38          | 5.3 (0.5)       | 3.6E-26 |
| 9   | rs76896860  | 136196174 | A  | G  | SURF6        | 3'-downstream   | 1.2E-31 | --  | 0.34 | 5.2 (1.0)      | 2.3E-07 | 0.38          | 5.3 (0.5)       | 3.6E-26 |
| 9   | rs866089    | 136199466 | A  | G  | SURF6        | missense(T>M)   | 2.2E-31 | --  | 0.33 | 5.0 (1.0)      | 6.4E-07 | 0.38          | 5.3 (0.5)       | 1.8E-26 |
| 9   | rs866090    | 136199503 | A  | G  | SURF6        | missense(R>W)   | 2.2E-31 | --  | 0.33 | 5.0 (1.0)      | 6.4E-07 | 0.38          | 5.3 (0.5)       | 1.8E-26 |
| 9   | rs62575995  | 136268311 | A  | G  | C9orf96      | intronic        | 1.1E-29 | ++  | 0.56 | -4.8 (1.0)     | 1.2E-06 | 0.48          | -5.2 (0.5)      | 5.4E-25 |
| 9   | rs59358281  | 136223043 | G  | C  | SURF1        | intronic        | 3.2E-28 | --  | 0.36 | 4.9 (1.0)      | 5.1E-07 | 0.42          | 4.9 (0.5)       | 6.1E-23 |
| 9   | rs553877    | 136214955 | A  | G  | MED22        | 5'-utr          | 3.2E-28 | --  | 0.36 | 4.9 (1.0)      | 5.4E-07 | 0.41          | 4.9 (0.5)       | 5.7E-23 |
| 9   | rs28407036  | 136252654 | T  | C  | C9orf96      | intronic        | 3.4E-28 | ++  | 0.01 | -15.6 (4.7)    | 1.7E-03 | 0.02          | -23.3 (1.9)     | 2.0E-28 |
| 9   | rs3739893   | 136243324 | T  | C  | C9orf96      | 5'-utr          | 3.4E-28 | ++  | 0.01 | -15.6 (4.7)    | 1.7E-03 | 0.02          | -23.3 (1.9)     | 2.0E-28 |
| 9   | rs8181039   | 136253927 | A  | G  | C9orf96      | intronic        | 3.4E-28 | ++  | 0.01 | -15.6 (4.7)    | 1.7E-03 | 0.02          | -23.3 (1.9)     | 2.0E-28 |
| 9   | rs616836    | 136213521 | T  | C  | MED22        | 5'-utr          | 3.6E-28 | --  | 0.36 | 4.9 (1.0)      | 6.1E-07 | 0.42          | 4.9 (0.5)       | 5.5E-23 |
| 9   | rs12763     | 136227260 | A  | G  | SURF2        | missense(S>G)   | 3.6E-28 | --  | 0.36 | 4.9 (1.0)      | 5.1E-07 | 0.42          | 4.9 (0.5)       | 7.0E-23 |
| 9   | rs2296810   | 136227694 | G  | C  | SURF2        | intronic        | 3.6E-28 | --  | 0.36 | 4.9 (1.0)      | 5.1E-07 | 0.42          | 4.9 (0.5)       | 7.0E-23 |
| 9   | rs1059773   | 136228665 | A  | C  | SURF4        | 3'-utr          | 3.6E-28 | --  | 0.36 | 4.9 (1.0)      | 5.1E-07 | 0.42          | 4.9 (0.5)       | 7.0E-23 |
| 9   | rs2269894   | 136232758 | C  | T  | SURF4        | intronic        | 3.6E-28 | --  | 0.36 | 4.9 (1.0)      | 5.1E-07 | 0.42          | 4.9 (0.5)       | 7.0E-23 |
| 9   | rs2494      | 136229833 | G  | C  | SURF4        | 3'-utr          | 3.6E-28 | --  | 0.36 | 4.9 (1.0)      | 5.1E-07 | 0.42          | 4.9 (0.5)       | 7.0E-23 |
| 9   | rs28374096  | 136235100 | C  | G  | SURF4        | intronic        | 3.6E-28 | --  | 0.36 | 4.9 (1.0)      | 5.1E-07 | 0.42          | 4.9 (0.5)       | 7.0E-23 |
| 9   | rs3118664   | 136281917 | A  | C  | ADAMTS13     | intronic        | 1.0E-27 | --  | 0.40 | 3.9 (1.0)      | 5.0E-05 | 0.45          | 5.0 (0.5)       | 4.1E-25 |
| 9   | rs3124779   | 136281966 | A  | G  | JAMTS13.REXC | intronic        | 1.0E-27 | --  | 0.40 | 3.9 (1.0)      | 5.0E-05 | 0.45          | 5.0 (0.5)       | 4.1E-25 |
| 9   | rs3124767   | 136308542 | T  | C  | ADAMTS13     | synonymous(G>G) | 5.6E-27 | ++  | 0.45 | -3.7 (1.0)     | 2.1E-04 | 0.41          | -5.3 (0.5)      | 2.7E-25 |
| 9   | rs3118669   | 136295615 | A  | T  | ADAMTS13     | intronic        | 8.1E-27 | ++  | 0.44 | -3.9 (1.0)     | 9.2E-05 | 0.41          | -5.2 (0.5)      | 1.6E-24 |
| 9   | rs3124769   | 136304137 | T  | A  | ADAMTS13     | intronic        | 3.5E-26 | ++  | 0.45 | -3.7 (1.0)     | 1.8E-04 | 0.42          | -5.2 (0.5)      | 3.0E-24 |
| 9   | rs739469    | 136298729 | C  | G  | ADAMTS13     | intronic        | 3.7E-26 | ++  | 0.45 | -3.7 (1.0)     | 2.1E-04 | 0.42          | -5.2 (0.5)      | 2.3E-24 |
| 9   | rs3124768   | 136304497 | G  | A  | ADAMTS13     | synonymous(T>T) | 4.4E-26 | ++  | 0.45 | -3.7 (1.0)     | 2.1E-04 | 0.42          | -5.2 (0.5)      | 2.8E-24 |
| 9   | rs2073932   | 136305439 | A  | G  | ADAMTS13     | intronic        | 4.4E-26 | ++  | 0.45 | -3.7 (1.0)     | 2.1E-04 | 0.42          | -5.2 (0.5)      | 2.8E-24 |
| 9   | rs11244090  | 136201191 | A  | G  | SURF6        | intronic        | 1.3E-24 | ++  | 0.02 | -13.1 (3.7)    | 7.6E-04 | 0.02          | -20.1 (1.8)     | 1.5E-23 |
| 9   | rs7030175   | 136274058 | G  | T  | REXO4        | intronic        | 5.1E-23 | --  | 0.76 | 3.8 (1.2)      | 1.3E-03 | 0.48          | 4.7 (0.5)       | 4.5E-22 |
| 9   | rs943623    | 136267371 | T  | G  | C9orf96      | intronic        | 2.9E-22 | ++  | 0.53 | -4.4 (1.0)     | 8.9E-06 | 0.47          | -4.4 (0.5)      | 4.1E-18 |
| 9   | rs3124747   | 136268084 | A  | G  | C9orf96      | missense(K>E)   | 1.6E-21 | ++  | 0.34 | -3.8 (1.0)     | 2.2E-04 | 0.32          | -4.8 (0.5)      | 3.7E-19 |
| 9   | rs3124776   | 136284450 | C  | T  | ADAMTS13     | intronic        | 1.8E-21 | ++  | 0.50 | -3.4 (1.0)     | 4.0E-04 | 0.47          | -4.6 (0.5)      | 1.8E-19 |
| 9   | rs10793964  | 136198589 |    |    |              |                 |         |     |      |                |         |               |                 |         |

|   |            |           |   |   |                 |                 |         |    |      |            |         |      |            |         |
|---|------------|-----------|---|---|-----------------|-----------------|---------|----|------|------------|---------|------|------------|---------|
| 9 | rs1179040  | 136241639 | T | C | <i>SURF4</i>    | intronic        | 1.6E-16 | ++ | 0.50 | -3.0 (1.0) | 2.2E-03 | 0.48 | -4.0 (0.5) | 4.9E-15 |
| 9 | rs571549   | 136221213 | T | C | <i>SURF1</i>    | intronic        | 1.9E-16 | ++ | 0.50 | -2.9 (1.0) | 2.9E-03 | 0.48 | -4.0 (0.5) | 3.7E-15 |
| 9 | rs658517   | 136222490 | G | A | <i>SURF1</i>    | intronic        | 1.9E-16 | ++ | 0.50 | -2.9 (1.0) | 2.9E-03 | 0.48 | -4.0 (0.5) | 3.7E-15 |
| 9 | rs652600   | 136311017 | G | A | <i>ADAMTS13</i> | intronic        | 1.9E-16 | ++ | 0.28 | -4.1 (1.1) | 1.8E-04 | 0.32 | -4.0 (0.5) | 1.7E-13 |
| 9 | rs1179041  | 136242669 | C | T | <i>SURF4</i>    | intronic        | 1.9E-16 | ++ | 0.49 | -3.3 (1.0) | 7.1E-04 | 0.47 | -3.8 (0.5) | 3.0E-14 |
| 9 | rs4962050  | 136323845 | C | G | <i>ADAMTS13</i> | intronic        | 2.4E-16 | ++ | 0.30 | -3.7 (1.1) | 6.7E-04 | 0.33 | -4.1 (0.5) | 4.1E-14 |
| 9 | rs487820   | 136212369 | A | G | <i>MED22</i>    | intronic        | 5.9E-16 | ++ | 0.47 | -3.2 (1.0) | 1.1E-03 | 0.47 | -3.8 (0.5) | 5.6E-14 |
| 9 | rs590858   | 136205775 | C | T | <i>MED22</i>    | 3'-downstream   | 3.1E-14 | ++ | 0.51 | -2.6 (1.0) | 7.1E-03 | 0.47 | -3.7 (0.5) | 3.1E-13 |
| 9 | rs120858   | 136200810 | A | G | <i>SURF6</i>    | intronic        | 6.2E-13 | ++ | 0.50 | -2.4 (1.0) | 1.3E-02 | 0.46 | -3.5 (0.5) | 3.9E-12 |
| 9 | rs3739890  | 136194812 | A | G | <i>SURF6</i>    | 3'-downstream   | 8.1E-13 | ++ | 0.50 | -2.4 (1.0) | 1.3E-02 | 0.46 | -3.4 (0.5) | 5.0E-12 |
| 9 | rs642059   | 136195734 | C | A | <i>SURF6</i>    | 3'-downstream   | 8.4E-13 | ++ | 0.50 | -2.4 (1.0) | 1.3E-02 | 0.46 | -3.4 (0.5) | 5.5E-12 |
| 9 | rs642060   | 136195736 | C | G | <i>SURF6</i>    | 3'-downstream   | 8.4E-13 | ++ | 0.50 | -2.4 (1.0) | 1.3E-02 | 0.46 | -3.4 (0.5) | 5.5E-12 |
| 9 | rs12335    | 136197834 | A | G | <i>SURF6</i>    | 3'-utr          | 8.4E-13 | ++ | 0.50 | -2.4 (1.0) | 1.3E-02 | 0.46 | -3.4 (0.5) | 5.5E-12 |
| 9 | rs551154   | 136197278 | T | G | <i>SURF6</i>    | 3'-downstream   | 8.4E-13 | ++ | 0.50 | -2.4 (1.0) | 1.3E-02 | 0.46 | -3.4 (0.5) | 5.5E-12 |
| 9 | rs551169   | 136197286 | A | G | <i>SURF6</i>    | 3'-downstream   | 9.1E-13 | ++ | 0.51 | -2.4 (1.0) | 1.3E-02 | 0.46 | -3.4 (0.5) | 5.5E-12 |
| 9 | rs176691   | 136163306 | A | G | <i>ABO</i>      | 5'-upstream     | 2.6E-11 | ++ | 0.38 | -2.4 (1.0) | 1.8E-02 | 0.36 | -3.4 (0.5) | 1.6E-10 |
| 9 | rs176692   | 136163329 | G | A | <i>ABO</i>      | 5'-upstream     | 2.6E-11 | ++ | 0.38 | -2.4 (1.0) | 1.8E-02 | 0.36 | -3.4 (0.5) | 1.6E-10 |
| 9 | rs3118671  | 136297407 | T | G | <i>ADAMTS13</i> | intronic        | 5.3E-11 | ++ | 0.13 | -3.3 (1.4) | 2.0E-02 | 0.20 | -3.9 (0.6) | 3.0E-10 |
| 9 | rs7869258  | 136170732 | A | G | <i>ABO</i>      | 5'-upstream     | 6.1E-11 | ++ | 0.38 | -2.5 (1.0) | 1.4E-02 | 0.36 | -3.3 (0.5) | 5.8E-10 |
| 9 | rs176699   | 136168086 | A | C | <i>ABO</i>      | 5'-upstream     | 8.0E-11 | ++ | 0.38 | -2.4 (1.0) | 1.8E-02 | 0.36 | -3.3 (0.5) | 5.8E-10 |
| 9 | rs532861   | 136171344 | T | C | <i>ABO</i>      | 5'-upstream     | 1.6E-10 | ++ | 0.38 | -2.5 (1.0) | 1.4E-02 | 0.35 | -3.1 (0.5) | 1.7E-09 |
| 9 | rs41297217 | 136338580 | A | G | <i>SLC2A6</i>   | synonymous(Y>Y) | 2.5E-10 | -- | 0.09 | 9.5 (1.6)  | 1.5E-09 | 0.17 | 2.4 (0.7)  | 2.6E-04 |
| 9 | rs4962126  | 136176998 | T | C | <i>ABO</i>      | 5'-upstream     | 7.2E-10 | ++ | 0.41 | -2.1 (1.0) | 4.2E-02 | 0.37 | -3.2 (0.5) | 1.8E-09 |
| 9 | rs3118685  | 136283389 | T | C | <i>ADAMTS13</i> | intronic        | 8.8E-10 | ++ | 0.11 | -4.0 (1.5) | 9.8E-03 | 0.15 | -3.9 (0.7) | 1.9E-08 |
| 9 | rs551924   | 136181539 | A | G | <i>SURF6</i>    | 3'-downstream   | 1.3E-09 | ++ | 0.17 | -3.7 (1.3) | 5.9E-03 | 0.28 | -3.1 (0.6) | 5.2E-08 |
| 9 | rs79473315 | 136362682 | G | A | <i>TMEM8C</i>   | 3'-downstream   | 1.6E-09 | -- | 0.14 | 5.2 (1.4)  | 1.3E-04 | 0.14 | 3.3 (0.7)  | 2.4E-06 |
| 9 | rs28668122 | 136370204 | T | C | <i>TMEM8C</i>   | 3'-downstream   | 2.5E-09 | -- | 0.14 | 5.4 (1.4)  | 7.7E-05 | 0.14 | 3.2 (0.7)  | 5.3E-06 |
| 9 | rs11244064 | 136161837 | A | G | <i>ABO</i>      | 5'-upstream     | 2.6E-09 | ++ | 0.32 | -1.2 (1.0) | 2.4E-01 | 0.31 | -3.4 (0.5) | 2.8E-10 |
| 9 | rs509001   | 136176269 | A | T | <i>ABO</i>      | 5'-upstream     | 3.2E-09 | ++ | 0.51 | -2.2 (1.0) | 3.1E-02 | 0.47 | -2.9 (0.5) | 1.6E-08 |
| 9 | rs11562629 | 136375057 | T | A | <i>TMEM8C</i>   | 3'-downstream   | 3.4E-09 | -- | 0.14 | 4.9 (1.4)  | 2.8E-04 | 0.14 | 3.3 (0.7)  | 2.7E-06 |
| 9 | rs28417862 | 136363670 | A | G | <i>TMEM8C</i>   | 3'-downstream   | 3.6E-09 | -- | 0.14 | 5.2 (1.4)  | 1.3E-04 | 0.14 | 3.2 (0.7)  | 5.0E-06 |
| 9 | rs9411492  | 136160617 | C | T | <i>ABO</i>      | 5'-upstream     | 4.0E-09 | -- | 0.23 | 2.4 (1.2)  | 3.4E-02 | 0.29 | 3.0 (0.5)  | 1.8E-08 |
| 9 | rs10901257 | 136163570 | A | G | <i>ABO</i>      | 5'-upstream     | 4.0E-09 | -- | 0.23 | 2.4 (1.2)  | 3.4E-02 | 0.29 | 3.0 (0.5)  | 1.8E-08 |
| 9 | rs10901256 | 136163447 | C | T | <i>ABO</i>      | 5'-upstream     | 5.0E-09 | -- | 0.23 | 2.4 (1.2)  | 3.4E-02 | 0.29 | 3.0 (0.5)  | 2.4E-08 |
| 9 | rs609202   | 136173855 | T | A | <i>ABO</i>      | 5'-upstream     | 5.7E-09 | ++ | 0.52 | -2.1 (1.0) | 4.3E-02 | 0.47 | -2.8 (0.5) | 2.0E-08 |
| 9 | rs11531875 | 136361286 | C | T | <i>SLC2A6</i>   | 5'-upstream     | 6.1E-09 | -- | 0.13 | 5.5 (1.4)  | 8.6E-05 | 0.14 | 3.1 (0.7)  | 1.1E-05 |
| 9 | rs4962125  | 136176977 | T | C | <i>ABO</i>      | 5'-upstream     | 6.7E-09 | -- | 0.23 | 2.7 (1.1)  | 1.7E-02 | 0.29 | 2.9 (0.5)  | 8.8E-08 |
| 9 | rs9411393  | 136176125 | G | A | <i>ABO</i>      | 5'-upstream     | 7.1E-09 | -- | 0.23 | 2.7 (1.2)  | 1.8E-02 | 0.29 | 2.9 (0.5)  | 8.8E-08 |
| 9 | rs3124778  | 136284050 | G | T | <i>ADAMTS13</i> | intronic        | 9.8E-09 | ++ | 0.11 | -4.0 (1.5) | 9.8E-03 | 0.16 | -3.5 (0.7) | 2.6E-07 |
| 9 | rs3124777  | 136284098 | C | T | <i>SLC2A6</i>   | 5'-upstream     | 9.8E-09 | ++ | 0.11 | -4.0 (1.5) | 9.8E-03 | 0.16 | -3.5 (0.7) | 2.6E-07 |
| 9 | rs1887519  | 136279234 | A | G | <i>ADAMTS13</i> | intronic        | 1.4E-08 | ++ | 0.11 | -4.1 (1.6) | 8.6E-03 | 0.16 | -3.5 (0.7) | 4.4E-07 |
| 9 | rs79784812 | 136378812 | A | G | <i>TMEM8C</i>   | 3'-downstream   | 1.5E-08 | -- | 0.13 | 5.1 (1.4)  | 2.5E-04 | 0.14 | 3.1 (0.7)  | 1.2E-05 |
| 9 | rs529309   | 136191641 | A | G | <i>SURF6</i>    | 3'-downstream   | 1.6E-08 | -- | 0.35 | 2.1 (1.0)  | 3.3E-02 | 0.38 | 2.7 (0.5)  | 9.2E-08 |
| 9 | rs517608   | 136192000 | C | T | <i>SURF6</i>    | 3'-downstream   | 1.8E-08 | -- | 0.35 | 2.1 (1.0)  | 3.7E-02 | 0.38 | 2.7 (0.5)  | 9.2E-08 |
| 9 | rs597411   | 136192624 | T | G | <i>SURF6</i>    | 3'-downstream   | 1.8E-08 | -- | 0.35 | 2.1 (1.0)  | 3.7E-02 | 0.38 | 2.7 (0.5)  | 9.2E-08 |
| 9 | rs56161877 | 136378662 | A | C | <i>TMEM8C</i>   | 3'-downstream   | 2.0E-08 | -- | 0.14 | 4.9 (1.4)  | 2.8E-04 | 0.15 | 3.0 (0.7)  | 1.4E-05 |
| 9 | rs57445522 | 136378618 | G | C | <i>TMEM8C</i>   | 3'-downstream   | 2.0E-08 | -- | 0.14 | 4.9 (1.4)  | 2.8E-04 | 0.15 | 3.0 (0.7)  | 1.4E-05 |
| 9 | rs10901261 | 136191754 | G | A | <i>SURF6</i>    | 3'-downstream   | 2.0E-08 | -- | 0.35 | 2.1 (1.0)  | 3.3E-02 | 0.38 | 2.7 (0.5)  | 1.2E-07 |
| 9 | rs11535669 | 136371468 | C | G | <i>REXO4</i>    | intronic        | 2.2E-08 | -- | 0.14 | 5.3 (1.4)  | 8.9E-05 | 0.15 | 2.9 (0.7)  | 3.5E-05 |
| 9 | rs554710   | 136181848 | C | T | <i>SURF6</i>    | 3'-downstream   | 3.9E-08 | ++ | 0.28 | -3.1 (1.1) | 5.7E-03 | 0.29 | -2.6 (0.5) | 2.0E-06 |
| 9 | rs623179   | 136174678 | T | C | <i>ABO</i>      | 5'-upstream     | 4.8E-08 | ++ | 0.34 | -1.0 (1.0) | 3.5E-01 | 0.32 | -3.1 (0.5) | 4.2E-09 |

Dir indicates direction of effect for the tested allele; A1, allele 1, is minor allele in TSS dataset and tested allele; A2, allele 2, is major allele in TSS; MAF: minor allele frequency;  $\beta$ : percentage change per allele.  
 \* Position uses NCBI Build 37 coordinates (UCSC hg19), which is used throughout the study.

**Table S5. ABO haplotype frequencies and associations with ADAMTS13 level**

| <b>ABO Haplotype</b> |                  |                  |                 | <b>GABC</b> |          | <b>TSS</b>  |          |
|----------------------|------------------|------------------|-----------------|-------------|----------|-------------|----------|
| <b>Allele</b>        | <b>rs8176749</b> | <b>rs8176704</b> | <b>rs687289</b> | <b>Freq</b> | <b>P</b> | <b>Freq</b> | <b>P</b> |
| <b>A2</b>            | C                | A                | A               | 0.06        | 0.01     | 0.05        | 0.58     |
| <b>B</b>             | T                | G                | A               | 0.07        | 0.48     | 0.07        | 0.16     |
| <b>A1</b>            | C                | G                | A               | 0.22        | 0.15     | 0.13        | 4.14E-05 |
| <b>O</b>             | C                | G                | G               | 0.64        | 0.83     | 0.75        | 0.01     |

Freq: Haplotype frequency

# Figure S1

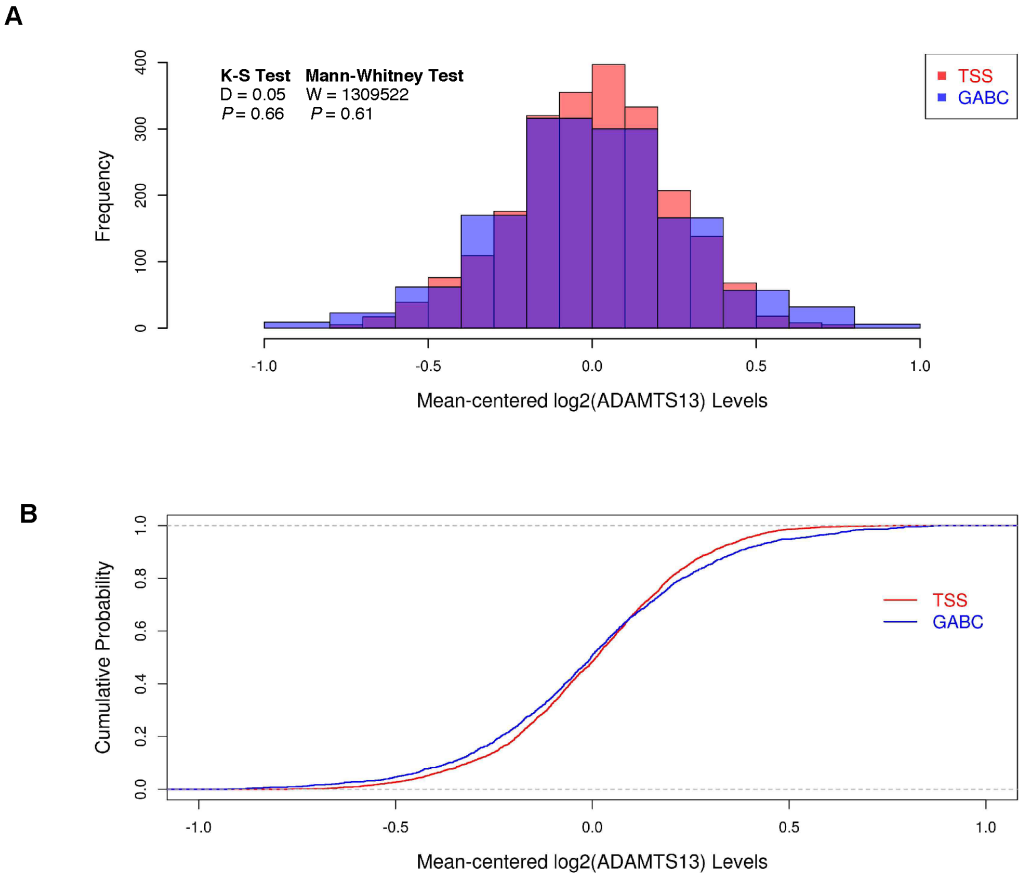

**Figure S1.** Comparison of ADAMTS13 level distribution between GABC and TSS. Shown are mean-centered log-transformed and outlier-removed values. (A) Histogram for mean centered and log<sub>2</sub>-transformed ADAMTS13 levels in GABC and TSS, along with results of two statistical tests that showed no difference between the distributions. (B) Cumulative probability distribution of ADAMTS13 levels in GABC and TSS.



**Figure S2**

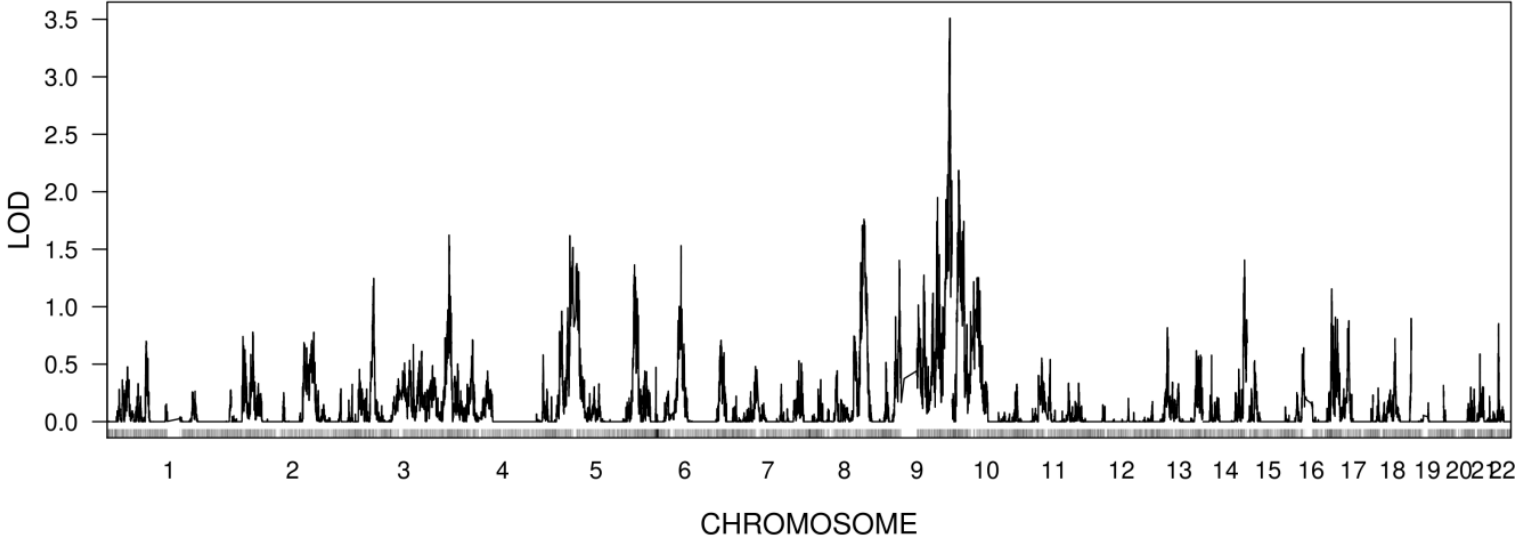

**Figure S2.** Linkage analysis in GABC and TSS sibs (n = 557 sibships). Genome-wide plot of LOD scores for GABC and TSS sibs using 35,356 independent LD clusters.

**Figure S3**

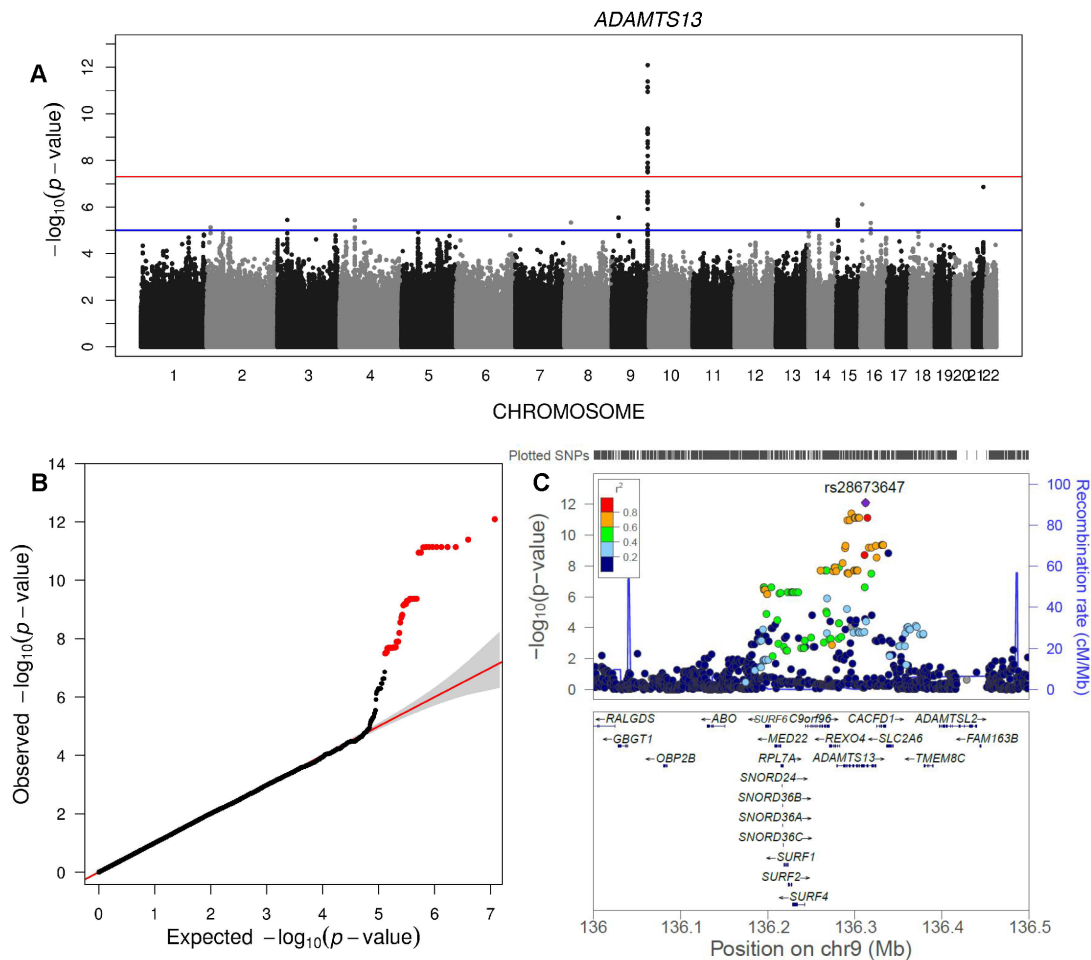

**Figure S3.** Association results for GABC. Using ~5.96 million SNPs. (A) Genome-wide  $-\log_{10}(P)$  plot. The red line marks the  $5.0E-8$  threshold of genome-wide significance. (B) Quantile-quantile plot of observed vs. expected  $-\log_{10}(P)$  for *ADAMTS13* association. The observed  $P < 5.0E-8$  are shown in red. (C) Regional plot for *ADAMTS13* gene on Chr9.

**Figure S4**

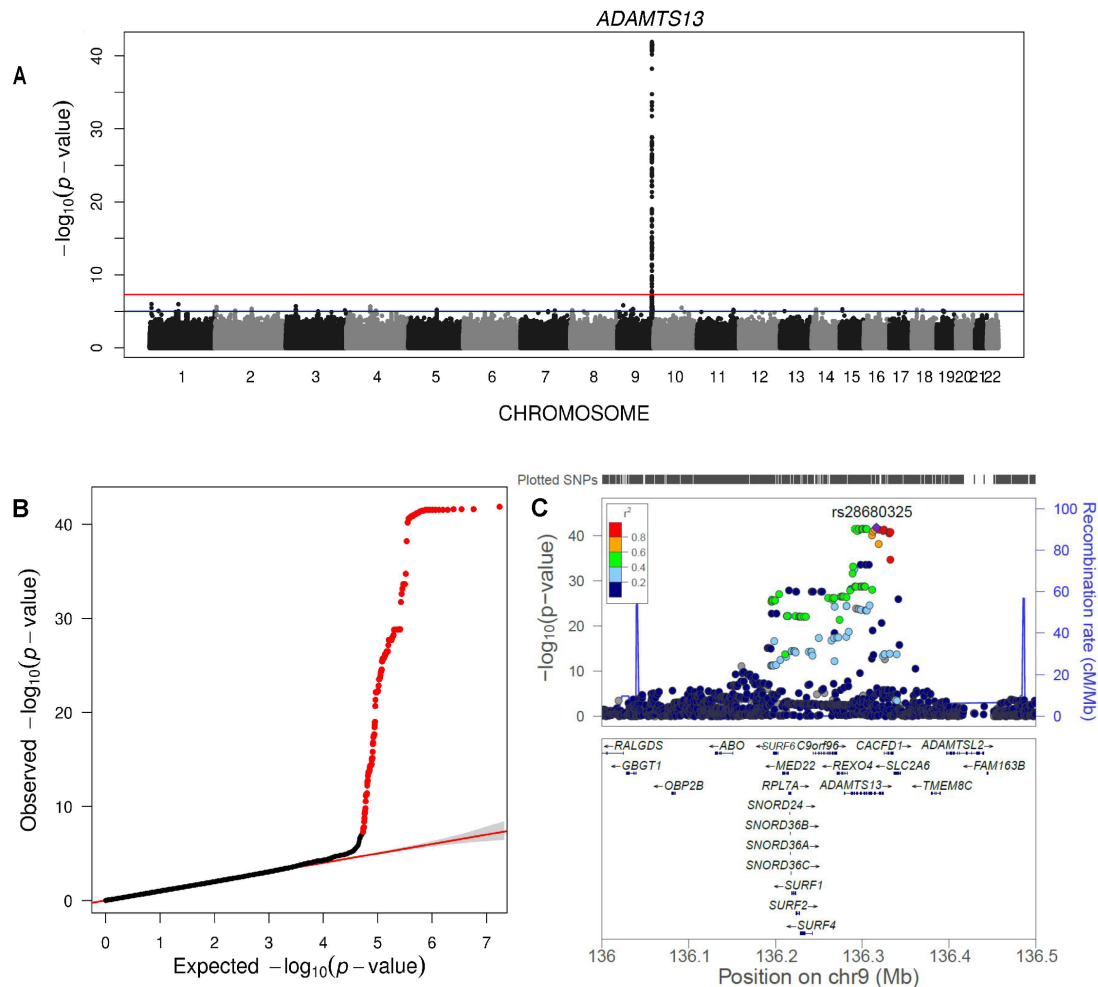

**Figure S4.** Association results for TSS. Using ~8.70 million SNPs. (A) Genome-wide  $-\log_{10}(P)$  plot. The red line marks the  $5.0E-8$  threshold of genome-wide significance. (B) Quantile-quantile plot of observed vs. expected  $-\log_{10}(P)$  for ADAMTS13 association. The observed  $P < 5.0E-8$  are shown in red. (C) Regional plot for ADAMTS13 gene on Chr9.

**Figure S5**

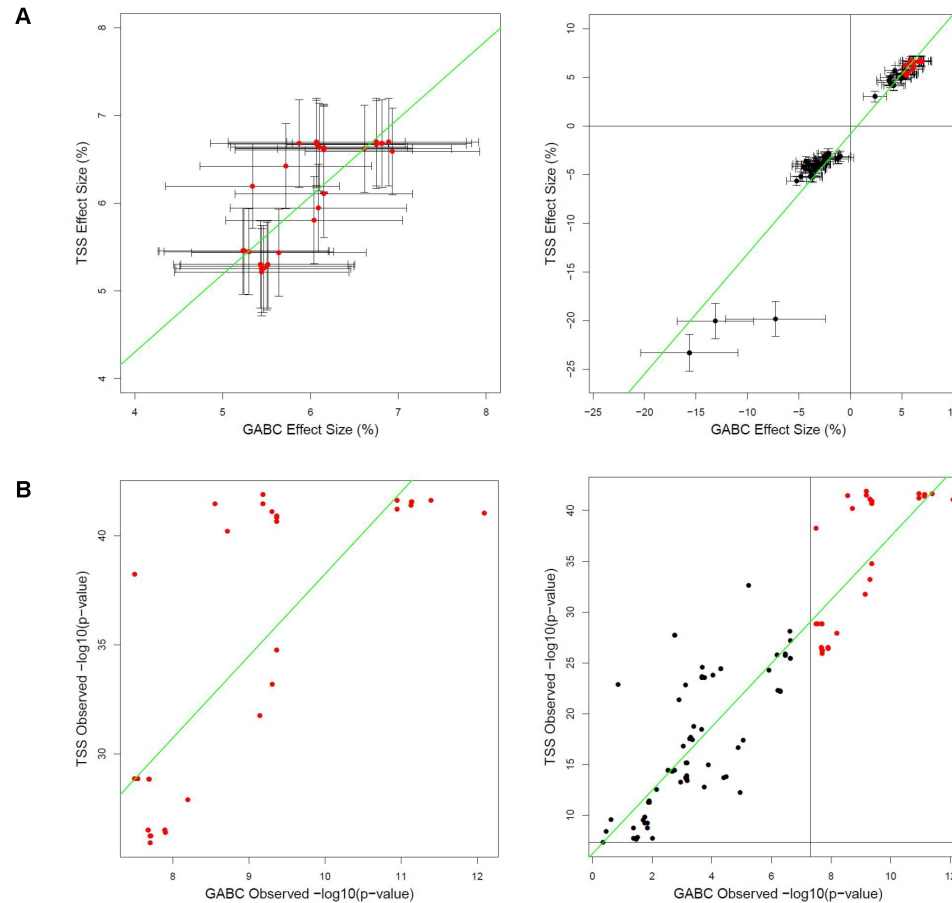

**Figure S5.** Comparisons of effect sizes and directions as well as  $P$ -values between GABC and TSS for SNPs significantly associated with ADAMTS13 in each cohort. Comparison of effect sizes and directions (A) and  $P$ -values (B) between GABC and TSS for top 45 SNPs in GABC (left) and top 133 SNPs in TSS (right). (A) Plotted are  $\beta$ -values in GABC (x-axis) and in TSS (y-axis), with 2 standard errors of  $\beta$  shown as error bars ( $r = 0.86$ ,  $P = 2.3E-14$  for top GABC SNPs;  $r = 0.98$ ,  $P < 2.2E-16$  for top TSS SNPs); (B) Shown are  $-\log_{10}(P)$  in GABC and TSS ( $r = 0.83$ ,  $P = 1.5E-12$  for top GABC SNPs;  $r = 0.92$ ,  $P < 2.2E-16$  for top TSS SNPs). Marked in red are SNPs that are significant in both GABC and TSS, for 45/45 SNPs (left) and 45/133 SNPs (right).

# Figure S6

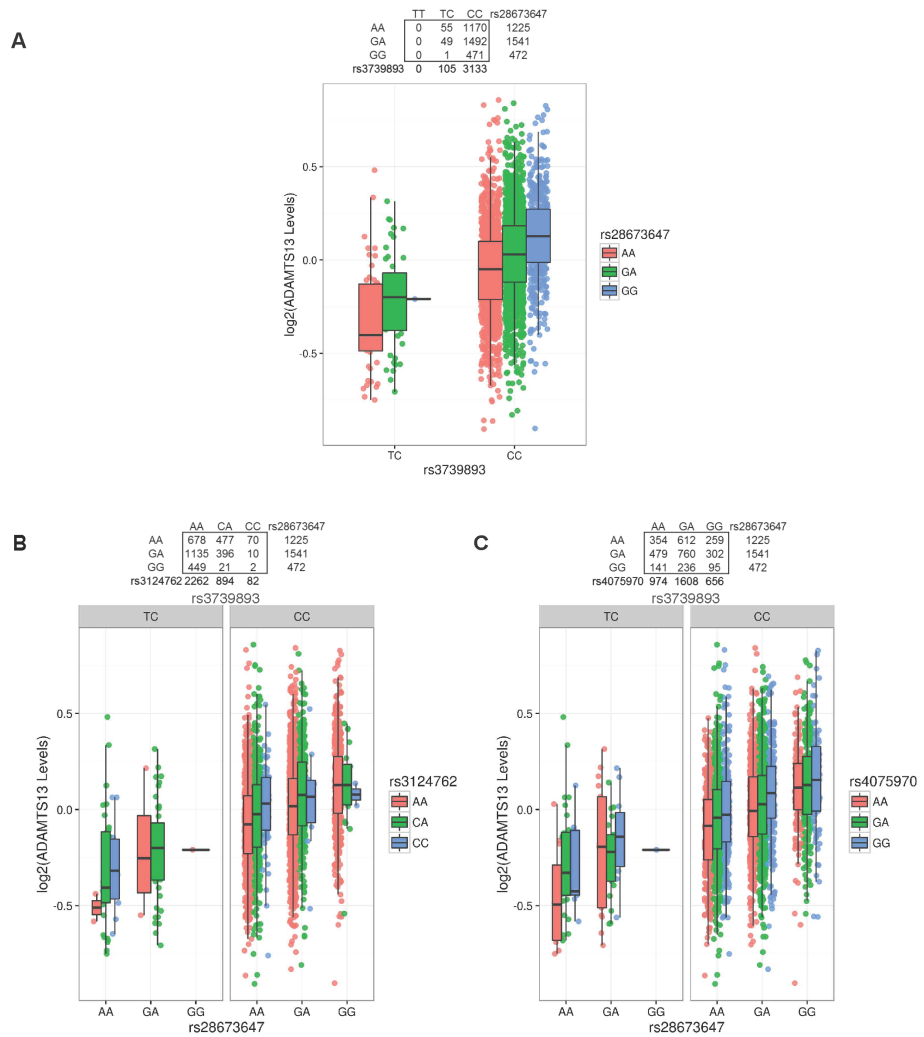

**Figure S6.** Independent Signals from Conditional analysis in GABC and TSS. (A) Boxplot of the distribution of ADAMTS13 levels in all genotype combinations of the top 2 independent SNPs, rs28673647 and rs3739893, ordered by allelic effect sizes and directions, which showed additive effects of rs28673647 in every stratum of rs3739893 genotype. One-way ANOVA test by coding the available genotype combinations as integers 1 – 6 revealed  $P = 3.6E-70$ . (B) Boxplot of ADAMTS13 levels in genotypes of the 3 independent signals at *ADAMTS13* locus – rs28673647, rs3739893 and rs3124762, demonstrating additive effects of rs3124762 in every stratum of rs28673647 and rs3739893 genotypes. One-way ANOVA test by coding the available genotypes as integers 1 – 16 revealed  $P = 9.1E-76$ . (C) Boxplot of ADAMTS13 levels in genotypes of rs28673647, rs3739893 in *ADAMTS13* and rs4075970 in *PRDM15*, showing additive effects of rs4075970 in every stratum of rs28673647 and rs3739893 genotypes. One-way ANOVA test by coding the genotypes as integers 1 – 16 revealed  $P = 7.2E-78$ . The inserted tables show the number of subjects of all genotype combinations.

Figure S7

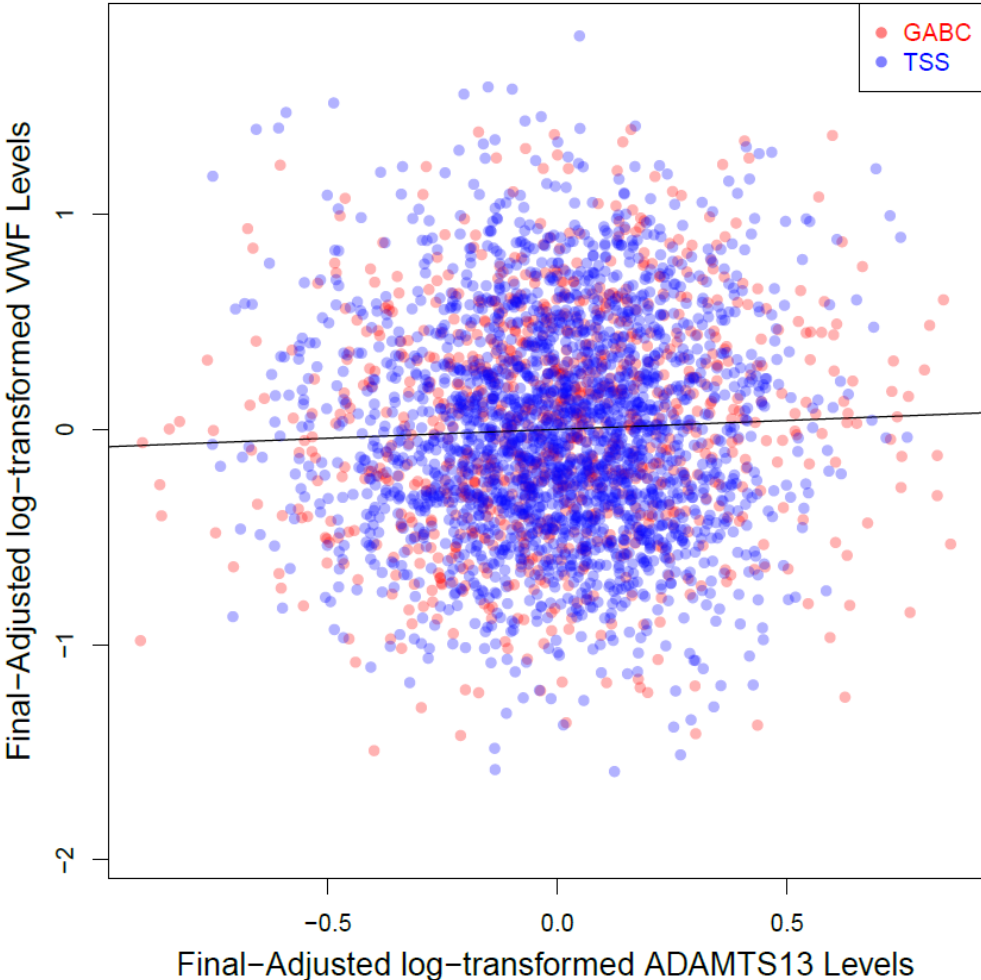

**Figure S7:** Dot plot for VWF and ADAMTS13 antigen levels in GABC (red) and TSS (blue). The VWF and ADAMTS13 levels were mean-centered, log2-transformed and adjusted for significant covariates as described in methods, respectively. The black line is the linear regression of VWF against ADAMTS13 levels.

**Figure S8**

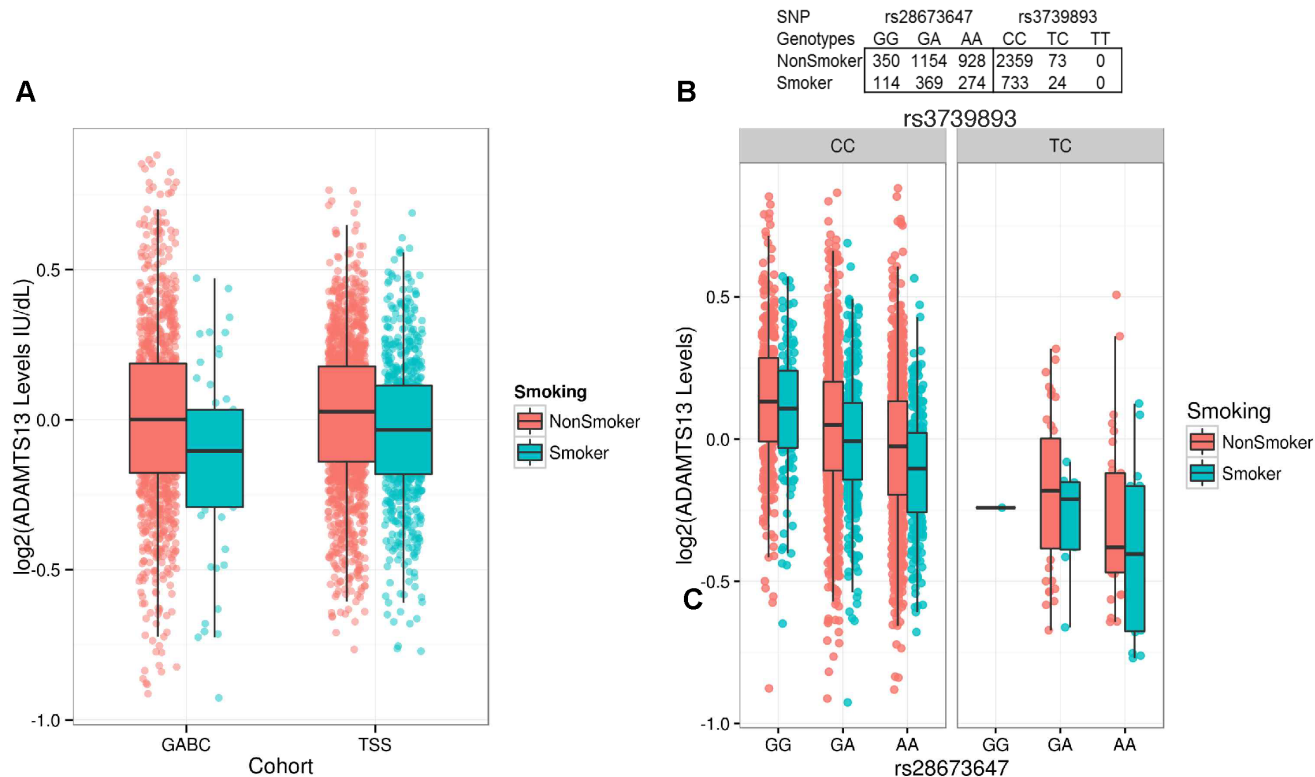

**Figure S8. Effect of smoking on ADAMTS13 antigen level.** (A) Boxplot of ADAMTS13 levels for smokers and non-smokers in GABC and TSS. (B) Boxplot of ADAMTS13 levels in GABC and TSS against smoking status and genotypes of the top 2 independent SNPs at *ADAMTS13* locus – rs28673647 and rs3739893. The inserted table shows the number of subjects for each genotype and smoking status. One-way ANOVA test by coding the available genotype and smoking status combinations ordered by allelic effect directions as integers 1 – 11 revealed  $P = 1.4E-73$ .
